# Supplementary material for: WNT4 Gene and Protein Expression in Endometrial Cancer and Its Significance
Source: MDPI journal article supplement (doi:10.3390/cancers15194780), 2023-09-28
Supplement: s1 [file s1]

**Supplementary Table S2.** Mutual exclusivity of alteration of *WNT4* and *ESR1* gene

| A    | B    | Neither A<br>Not B | Neither B<br>Not A | Neither<br>Both | Log2 | Odds<br>Ratio | p-<br>Value | q-<br>Value | Tendency              |
|------|------|--------------------|--------------------|-----------------|------|---------------|-------------|-------------|-----------------------|
| WNT4 | ESR1 | 35                 | 4                  | 6               | 0    | <-3           | 1.000       | 1.000       | Mutual<br>exclusivity |
